# Supplementary material
Source: PubMed Central journal article supplement (PMC1450120)

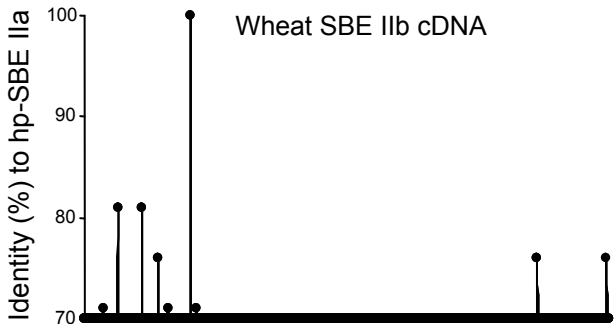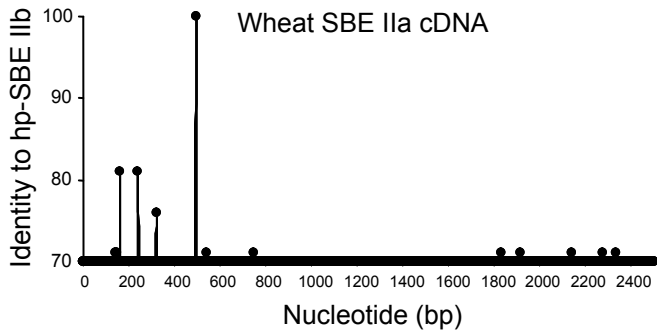

Supplement: pnas_0510737103_2.pdf [file pnas_0510737103_2.pdf]

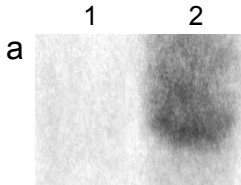

SBE IIa probe

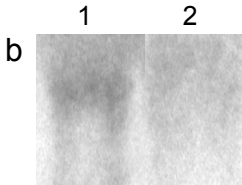

SBE IIb probe

Supplement: pnas_0510737103_3.pdf [file pnas_0510737103_3.pdf]
